# Supplementary material for: Polymer coordination promotes selective CO2 reduction by cobalt phthalocyanine
Source: Chem Sci. 2016 Feb 2;7(4):2506–15. doi: 10.1039/c5sc04015a (PMC5477023; doi:10.1039/c5sc04015a)
Supplement: Supplementary file 1 [file SC-007-C5SC04015A-s001.pdf]

## **Polymer coordination promotes selective CO<sub>2</sub> reduction by cobalt phthalocyanine**

Wesley W. Kramer<sup>a</sup>, Charles C. L. McCrory<sup>a,†,\*</sup>

<sup>a</sup> *California Institute of Technology, Pasadena, California*

<sup>†</sup> *Present Address: University of Michigan, Ann Arbor, Michigan*

**-- Supporting Information--**

## **Table of Contents**

|                                              |            |
|----------------------------------------------|------------|
| Cyclic voltammograms of modified electrodes. | <b>S3</b>  |
| Controlled potential electrolyses.           | <b>S8</b>  |
| Control CPE experiment results.              | <b>S11</b> |

Cyclic voltammograms of modified electrodes

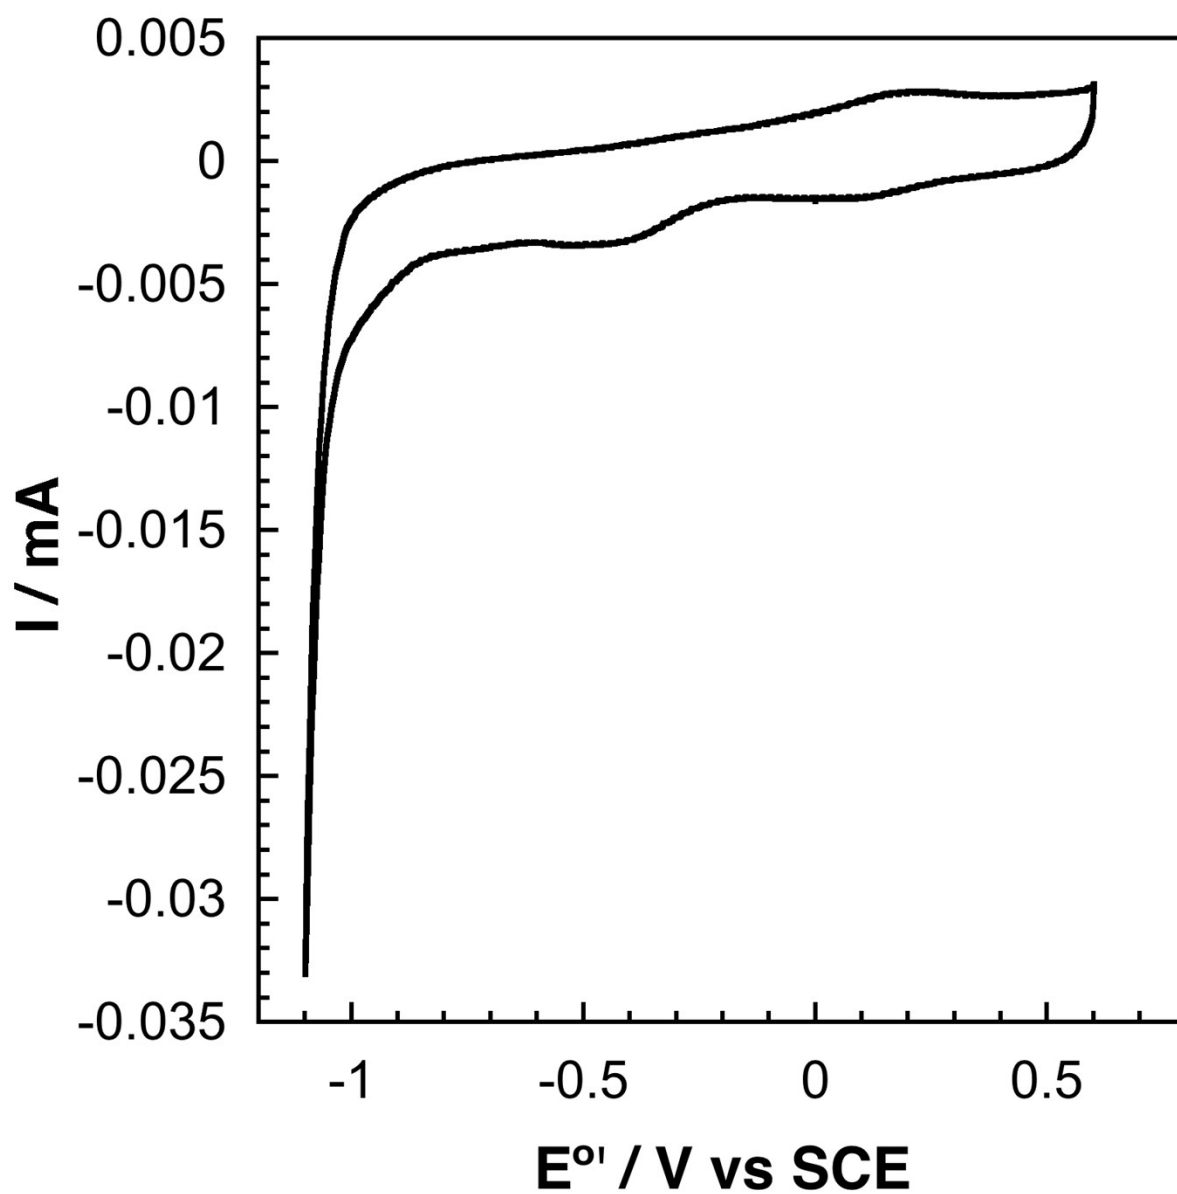

**Figure S1.** Cyclic voltammogram of CoPc modified edge plane graphite (EPG) electrode at 200  $\text{mV s}^{-1}$ .

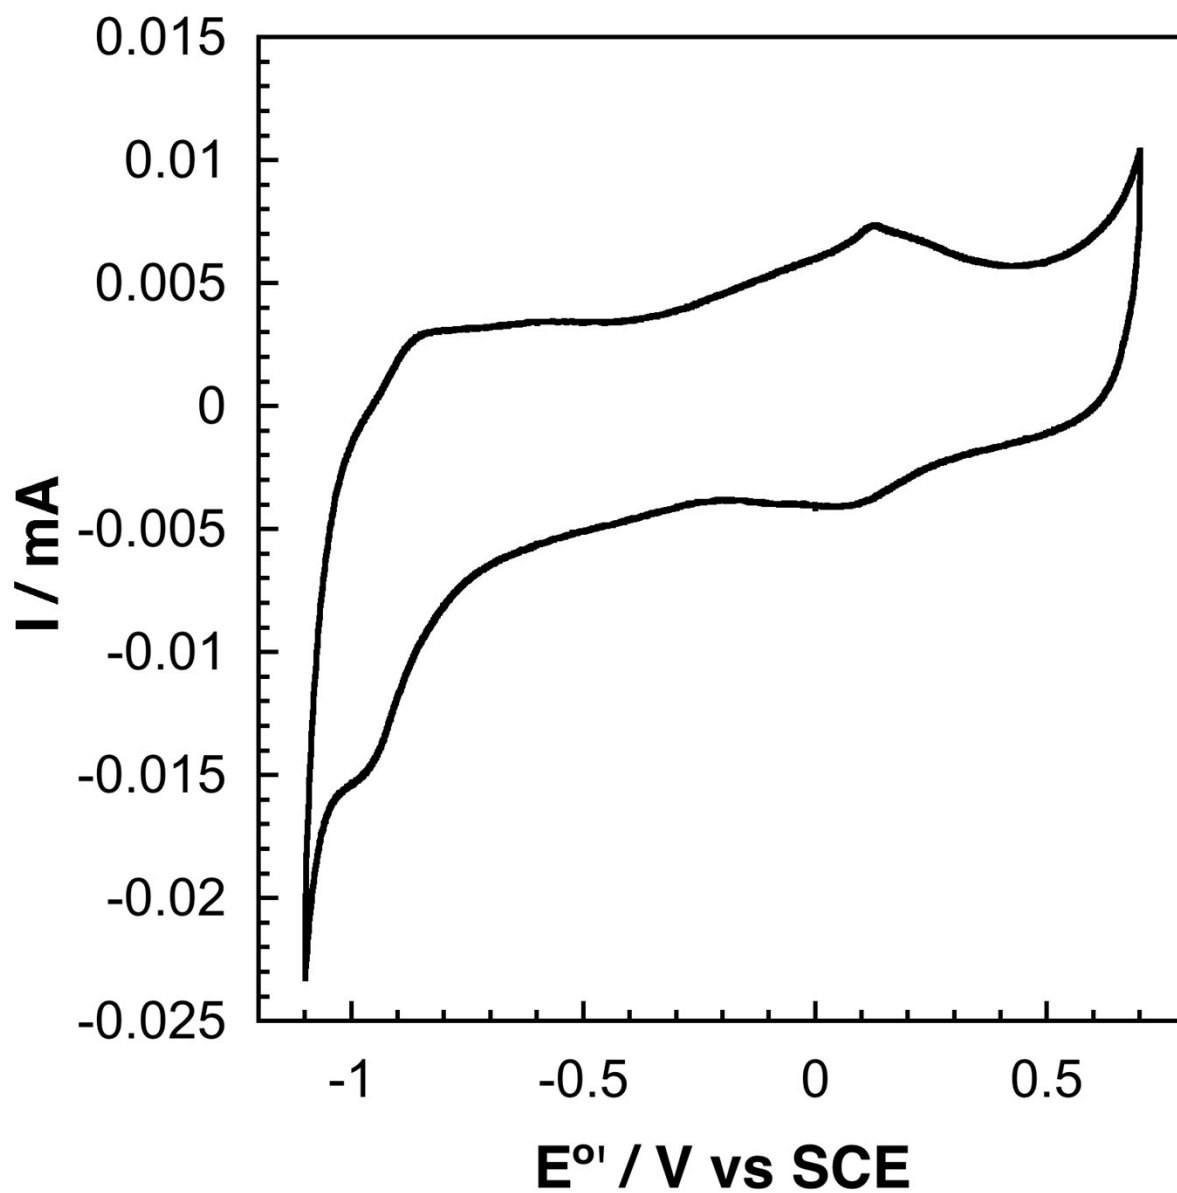

**Figure S2.** Cyclic voltammogram of CoPc-P4VP modified edge plane graphite (EPG) electrode at  $200 \text{ mV s}^{-1}$ .

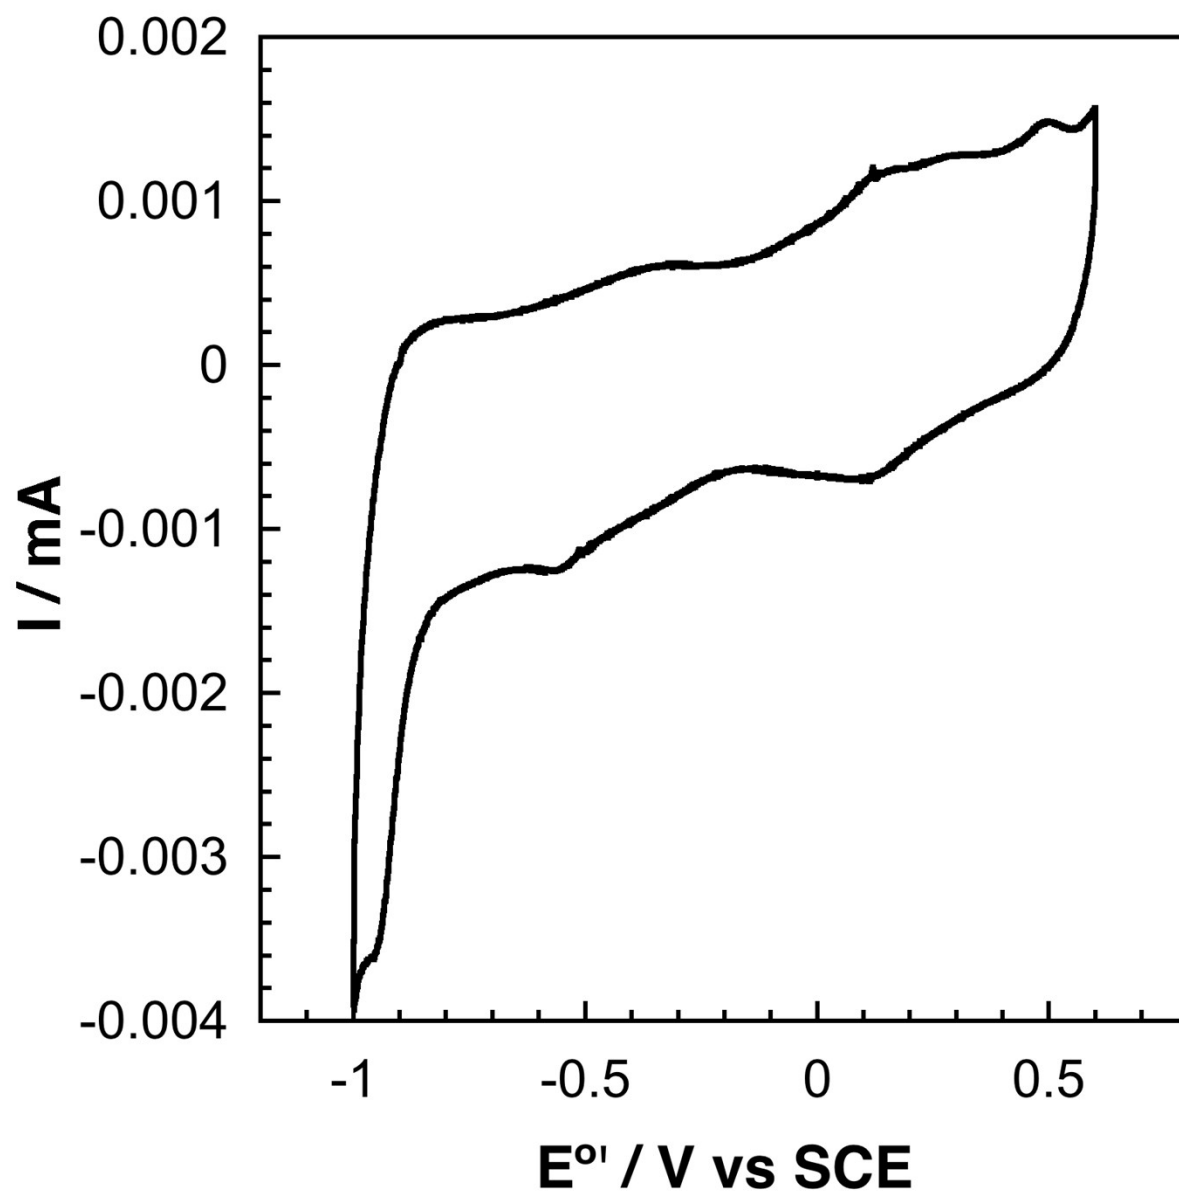

**Figure S3.** Cyclic voltammogram of CoPc(py) modified edge plane graphite (EPG) electrode at  $200 \text{ mV s}^{-1}$ .

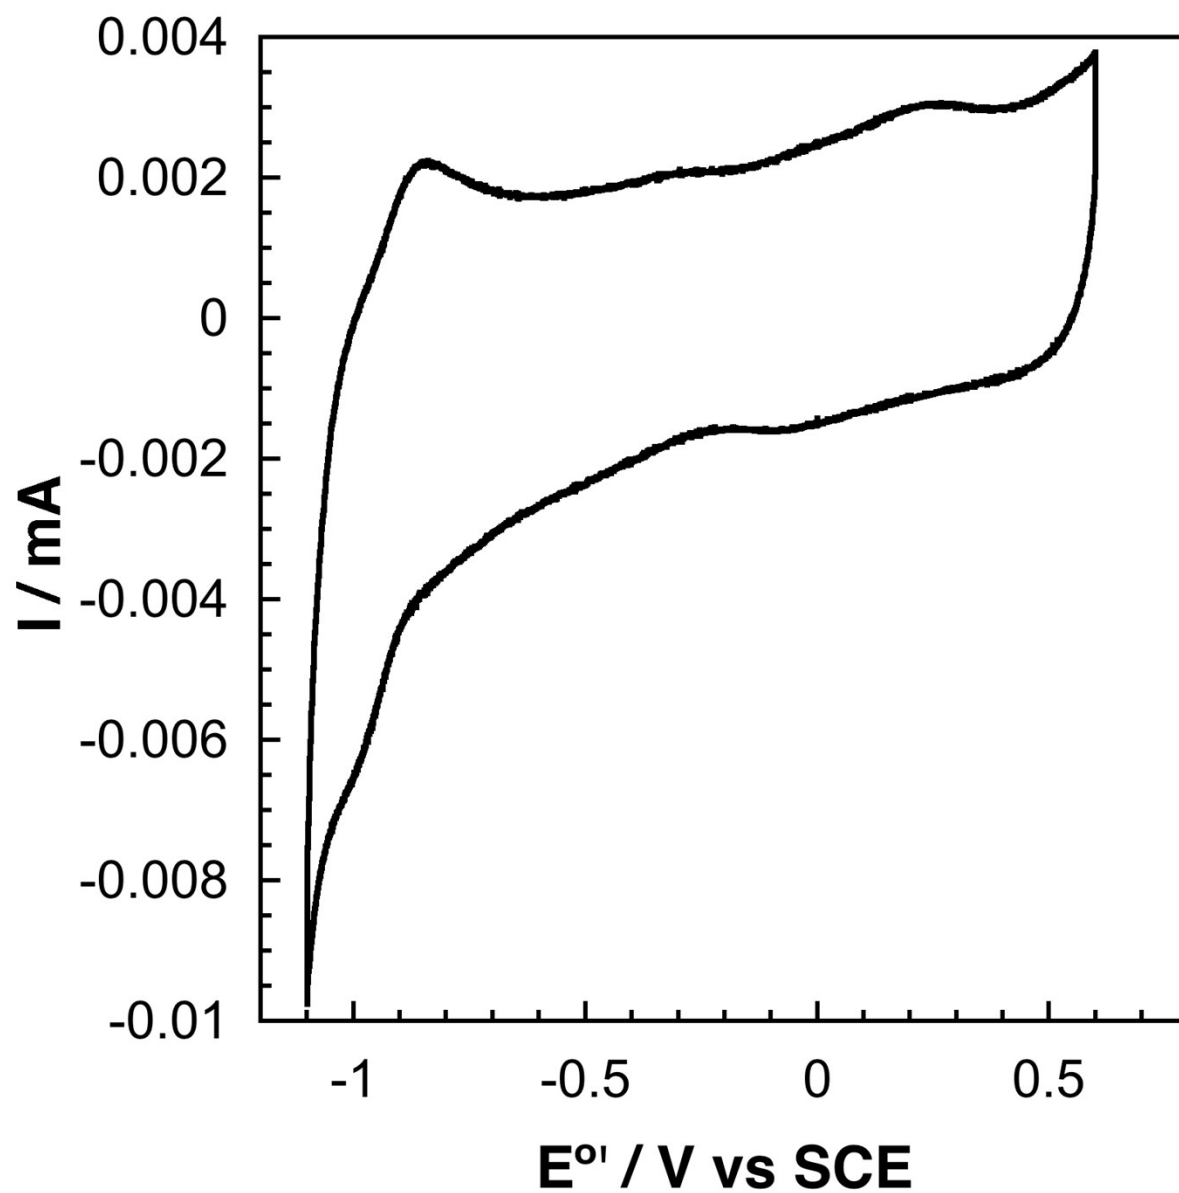

**Figure S4.** Cyclic voltammogram of CoPc-P2VP modified edge plane graphite (EPG) electrode at  $200 \text{ mV s}^{-1}$ .

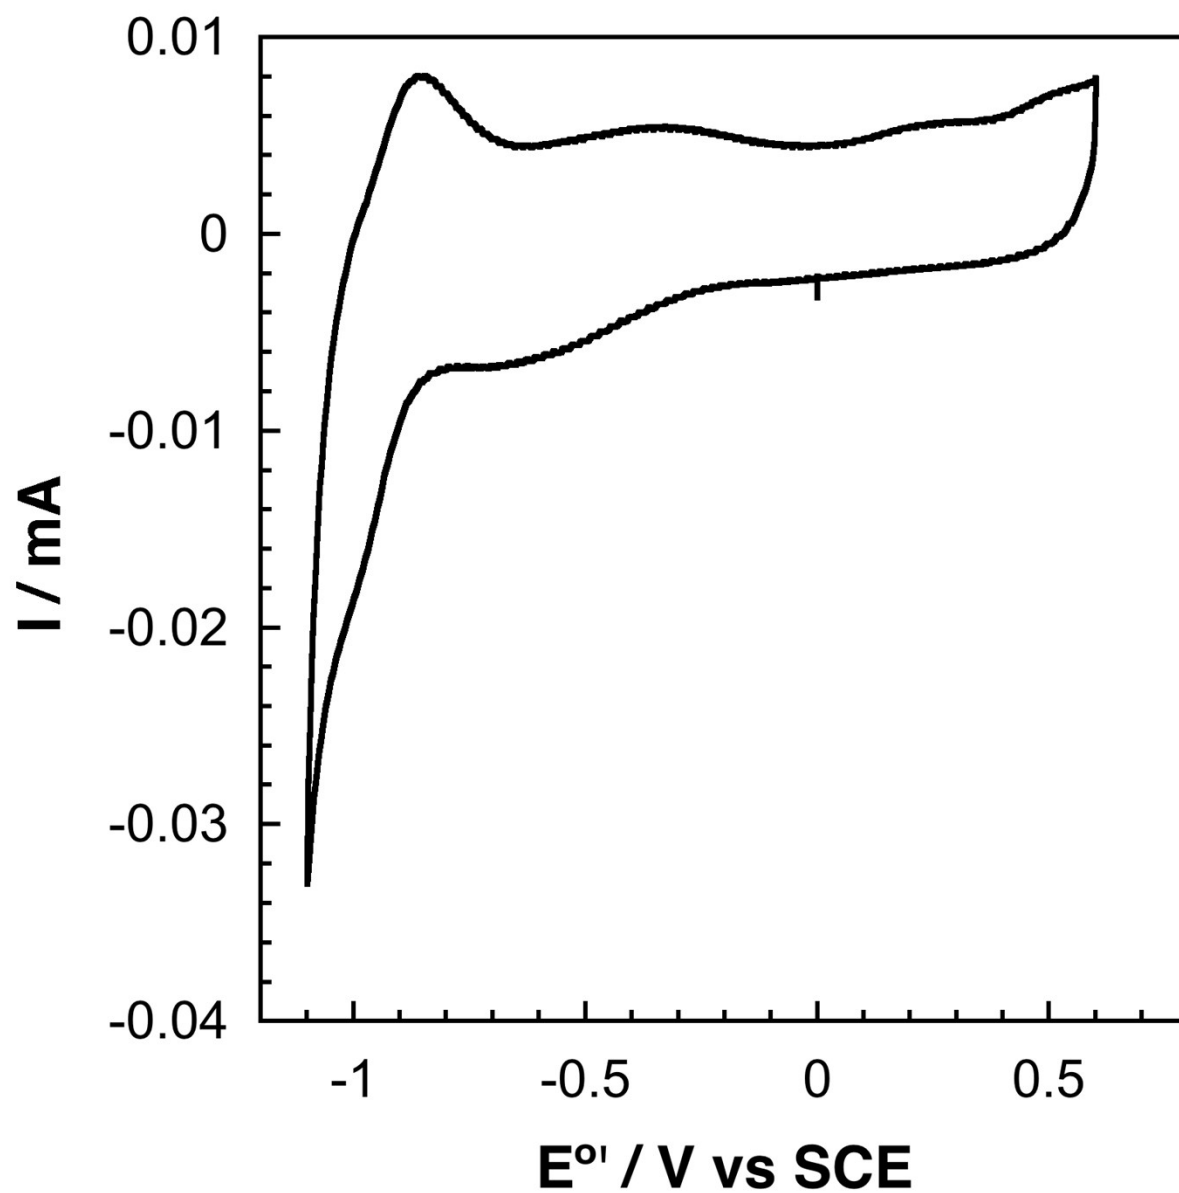

**Figure S5.** Cyclic voltammogram of CoPc(py)-P2VP modified edge plane graphite (EPG) electrode at  $200 \text{ mV s}^{-1}$ .

### Controlled Potential Electrolyses

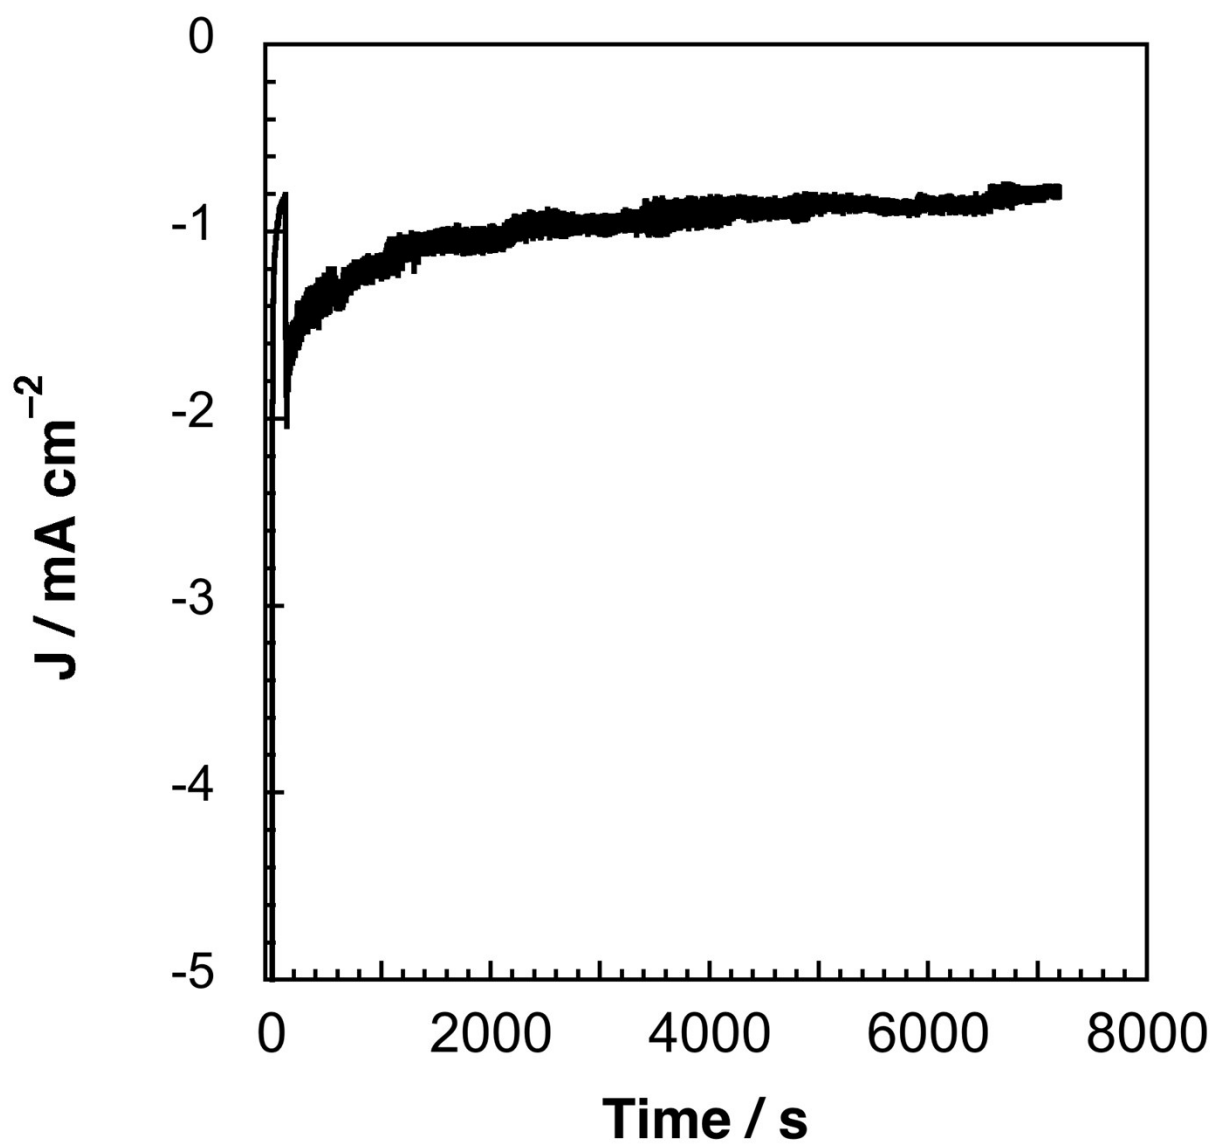

**Figure S6.** Representative CPE data for CoPc(py) modified edge plane graphite (EPG) electrodes.

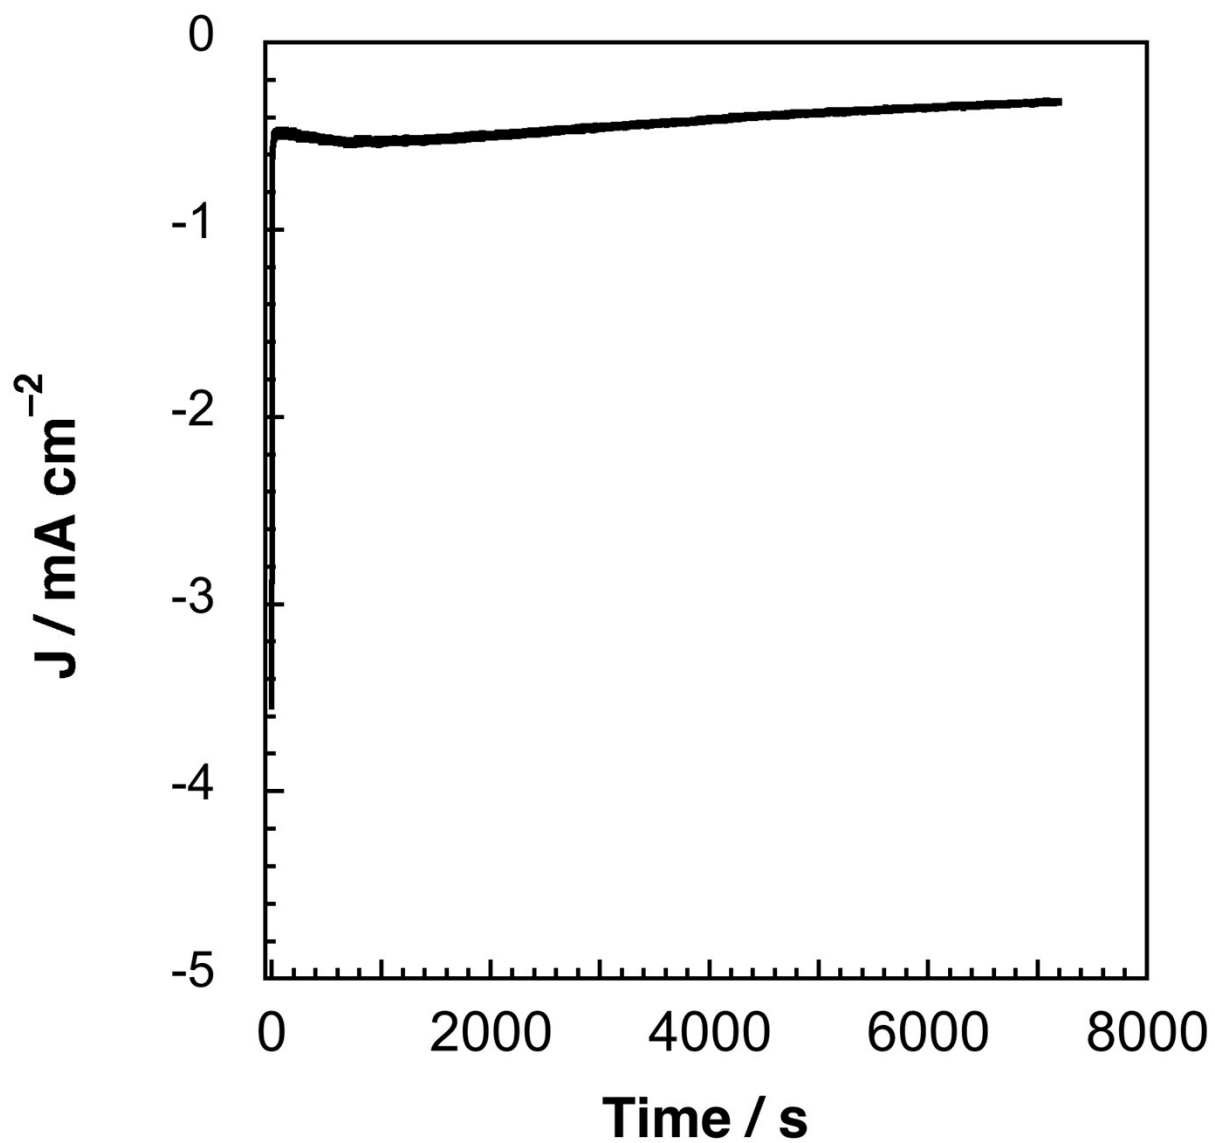

**Figure S7.** Representative CPE data for CoPc-P2VP modified edge plane graphite (EPG) electrodes.

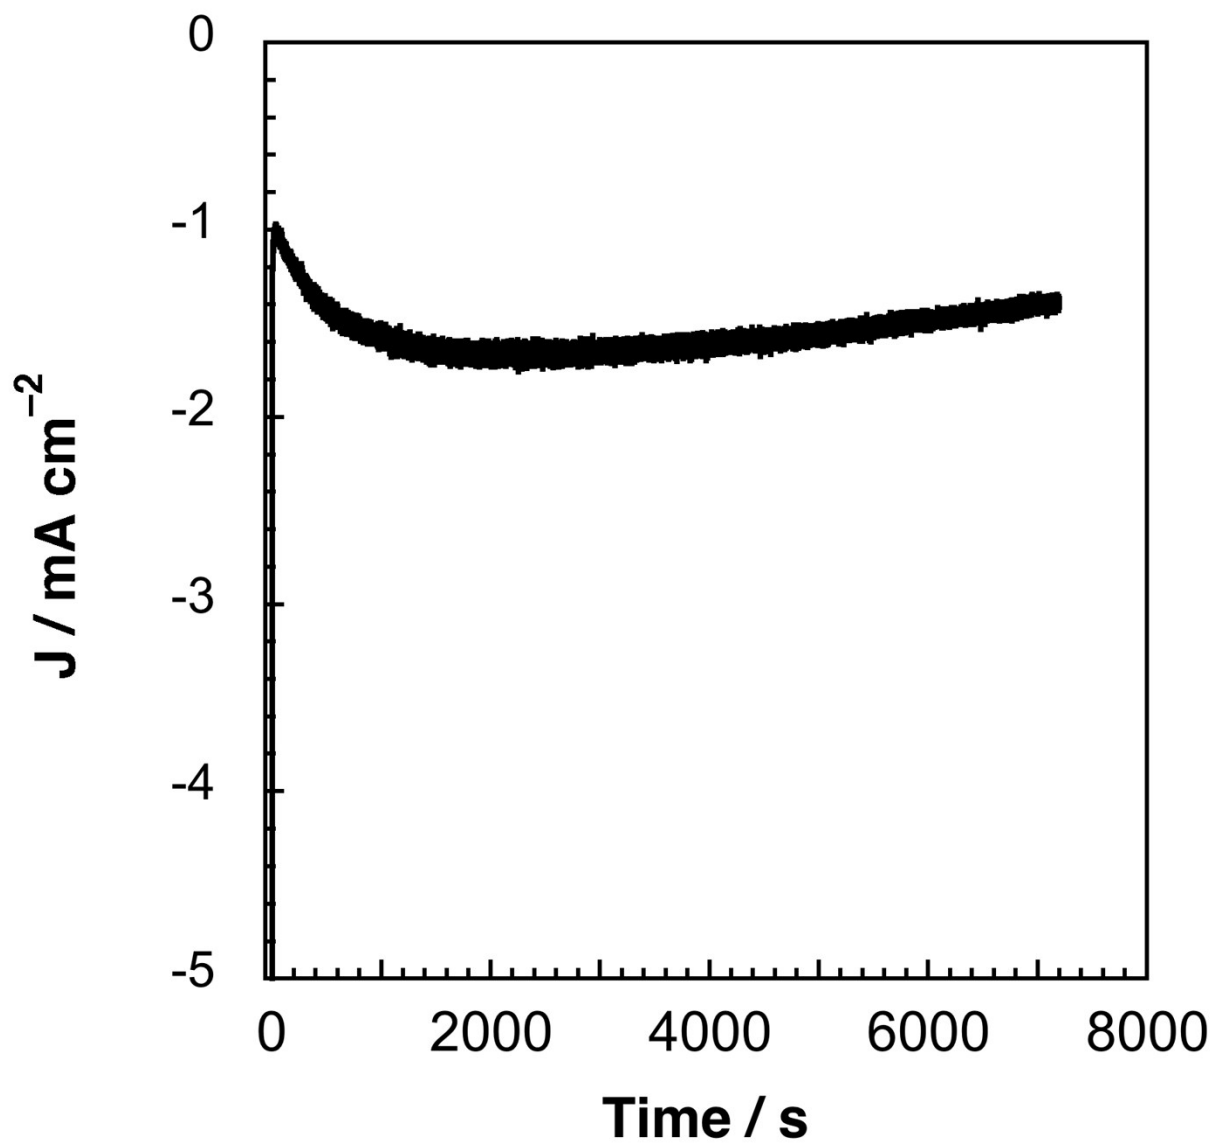

**Figure S8.** Representative CPE data for CoPc(py) modified edge plane graphite (EPG) electrodes.

## Control CPE experiments results

**Table S1.** Results obtained from 2 h CPE experiments at -1.25 V vs SCE for EPG and EPG-P4VP electrodes in CO<sub>2</sub> saturated 0.1 M aqueous NaH<sub>2</sub>PO<sub>4</sub> at pH 4.7 under a CO<sub>2</sub> atmosphere. Results for CPE experiments with CoPc and CoPc-P4VP under the same conditions are included for comparison. Errors are given as standard deviations.

|           | Charge / C        | $\mu\text{mol CO}$<br>produced | $\mu\text{mol H}_2$<br>produced |
|-----------|-------------------|--------------------------------|---------------------------------|
| EPG       | 0.36 $\pm$ 0.18   | 0.17 $\pm$ 0.02                | 1.2 $\pm$ 0.8                   |
| EPG-PVP   | 0.061 $\pm$ 0.049 | 0.17 $\pm$ 0.2                 | 0.09 $\pm$ 0.09                 |
| CoPc      | 0.58 $\pm$ 0.24   | 1.1 $\pm$ 0.6                  | 1.2 $\pm$ 0.4                   |
| CoPc-P4VP | 1.9 $\pm$ 0.2     | 8.9 $\pm$ 1.1                  | 0.47 $\pm$ 0.09                 |

**Table S2.** Results obtained from 2 h CPE experiments at -1.25 V vs SCE for CoPc and CoPc-P4VP modified electrodes in N<sub>2</sub> saturated 0.1 M aqueous NaH<sub>2</sub>PO<sub>4</sub> at pH 5 under a N<sub>2</sub> atmosphere. Results for CPE experiments with CoPc and CoPc-P4VP performed in CO<sub>2</sub> saturated electrolyte under a CO<sub>2</sub> atmosphere are included for comparison. Errors are given as standard deviations.

|                              | Charge / C      | $\epsilon_{\text{CO}}$ | TON <sub>CO</sub> (2h)      | $\epsilon_{\text{H}_2}$ | TON <sub>H<sub>2</sub></sub> (2h) |
|------------------------------|-----------------|------------------------|-----------------------------|-------------------------|-----------------------------------|
| CoPc (N <sub>2</sub> )       | 0.55 $\pm$ 0.29 | N/A                    | N/A                         | 54 $\pm$ 16%            | 7.4 $\pm$ 5.5 $\times 10^3$       |
| CoPc-P4VP (N <sub>2</sub> )  | 0.28 $\pm$ 0.16 | N/A                    | N/A                         | 52 $\pm$ 16%            | 2.4 $\pm$ 1.5 $\times 10^3$       |
| CoPc (CO <sub>2</sub> )      | 0.58 $\pm$ .24  | 36 $\pm$ 7%            | 4.5 $\pm$ 2.4 $\times 10^3$ | 41 $\pm$ 8%             | 4.7 $\pm$ 1.5 $\times 10^3$       |
| CoPc-P4VP (CO <sub>2</sub> ) | 1.9 $\pm$ 0.2   | 89 $\pm$ 3%            | 3.4 $\pm$ 0.4 $\times 10^4$ | 5 $\pm$ 1               | 1.9 $\pm$ 0.4 $\times 10^3$       |

**Table S3.** Results obtained from 2 h CPE experiments at -1.25 V vs SCE for CoPc modified electrodes in CO<sub>2</sub> saturated 0.1 M aqueous NaH<sub>2</sub>PO<sub>4</sub> at pH 5 under a CO<sub>2</sub> atmosphere with 0.05 mM added pyridine (py) and 2,6 lutidine (lut). Results for CPE experiments with CoPc without added py or lut and CoPc(py) are included for comparison. Errors are given as standard deviations.

|                    | Charge / C      | $\epsilon_{\text{CO}}$ | TON <sub>CO</sub> (2h)      | $\epsilon_{\text{H}_2}$ | TON <sub>H<sub>2</sub></sub> (2h) |
|--------------------|-----------------|------------------------|-----------------------------|-------------------------|-----------------------------------|
| CoPc + 0.05 mM py  | 0.54 $\pm$ 0.23 | 44 $\pm$ 13%           | 5.1 $\pm$ 3.5 $\times 10^3$ | 47 $\pm$ 6%             | 5.1 $\pm$ 2.3 $\times 10^3$       |
| CoPc + 0.05 mM lut | 0.55 $\pm$ 0.06 | 32 $\pm$ 2%            | 3.8 $\pm$ 0.6 $\times 10^3$ | 31 $\pm$ 19 %           | 3.6 $\pm$ 2.3 $\times 10^3$       |
| CoPc               | 0.58 $\pm$ .24  | 36 $\pm$ 7%            | 4.5 $\pm$ 2.4 $\times 10^3$ | 41 $\pm$ 8%             | 4.7 $\pm$ 1.5 $\times 10^3$       |
| CoPc(py)           | 0.83 $\pm$ .48  | 68 $\pm$ 3%            | 1.2 $\pm$ 0.7 $\times 10^4$ | 19 $\pm$ 5%             | 2.9 $\pm$ 1.2 $\times 10^3$       |
